# Supplementary material
Source: MDPI journal article supplement (https://www.mdpi.com/2076-3417/11/24/12088)

Figure S1. The chromatograms of MGDGs standard mixture on various m/z values. The plots present lipids containing following lipid chains (from the top): (1)18:1/18:1, (2)18:2/18:1, (3)18:3/18:1+18:2/18:2, (4)18:3/18:2, (5)18:3/18:3.

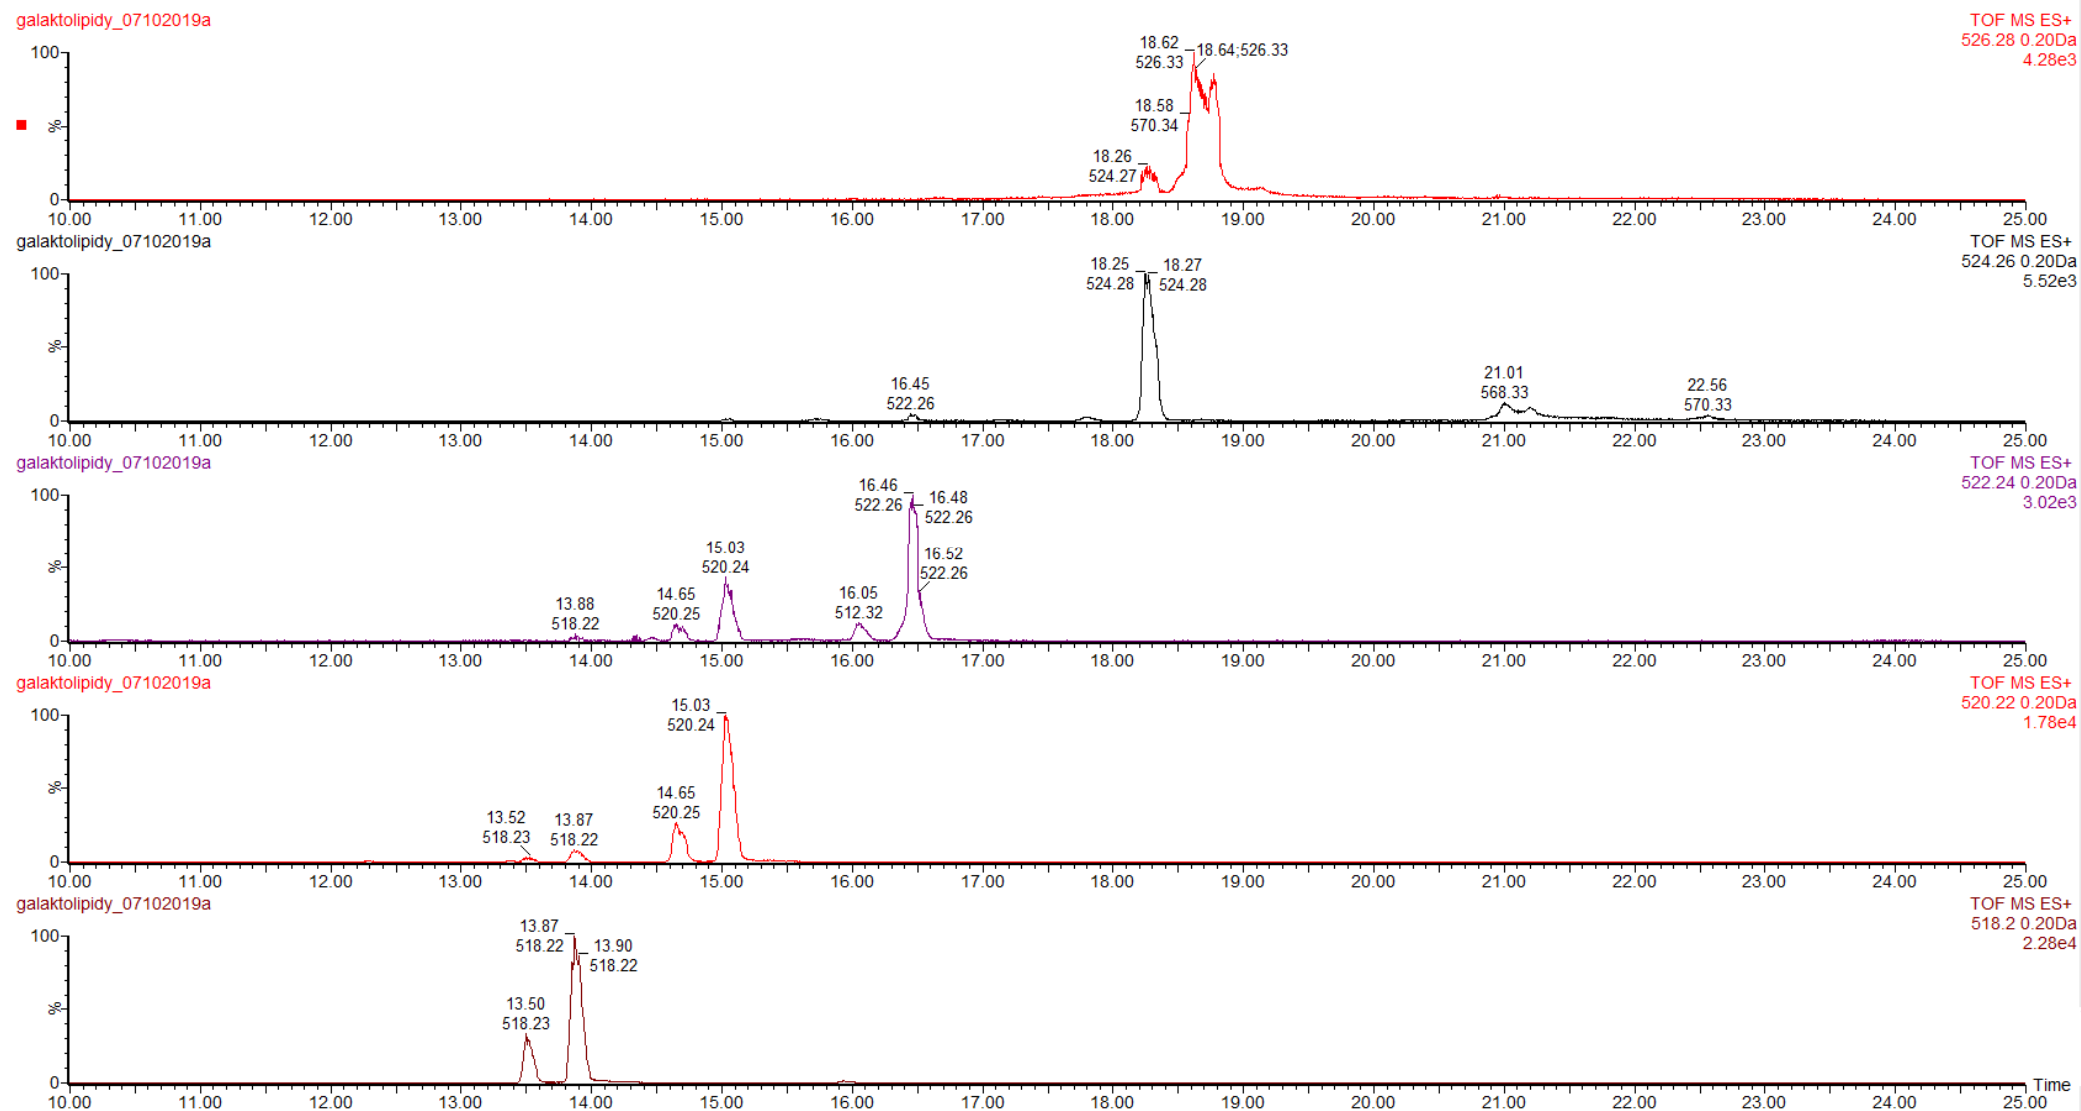

Supplement: s1 [file s1]
